# Supplementary material for: Pre-Primary Education Practices and Quality Service Provision in Gambella Regional State, Ethiopia
Source: Research Square preprint supplement (doi:10.21203/rs.3.rs-4149515/v1), 2024-04-19
Supplement: Supplementary file 1 [file 0a34815f19d7d80c81ea06c5.docx]

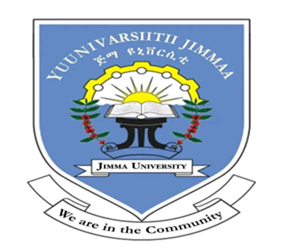


College of Education and Behavioral Sciences

Department of Educational Planning and Management

Questionnaires for Pre-Primary School Teachers and Principals

Dear Pre-primary School Teachers and Principals,

I am a PhD candidate at Jimma University College of education and behavioral sciences, department of educational planning and management, and currently doing a research on **Practices and Determinants of Quality Service Provision in Pre-Primary Schools of Gambella Region State, Ethiopia**. Your participation is entirely voluntary and essential for the success of this research. Please respond truthfully and honestly to ensure the accuracy of the study's findings. Rest assured that all information provided will be treated with utmost privacy and confidentiality.

Please take the time to comprehensively complete this questionnaire. For items with alternative responses, kindly use a checkbox (☑) to show your choices.

Thank you for your time and willingness to participate in this research project.

Yours faithfully,

Chala Ayele Legede

Gambella Region Education Bureau

Cellphone +251913078822 **/ 0**911001383

E.mail: chalaayele@yahoo.com/chalaayele20@gmail.com

1. **General Background of the Respondents**
   1. Name of Woreda _____________
   2. Category of respondents: 1. Pre-primary teacher 2. Principal
   3. Gender: 1. Male 2. Female
   4. Age: 1. 20 – 30 years
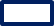
 2. 31 – 40 years
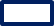
 3. 41 – 50 years
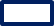
 4. 51 years and above___________
   5. Qualification: 1. Certificate
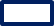
 2.Diploma
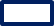
 3. First Degree
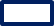
 4. Any other________
   6. Year/s of teaching experience as pre-primary teacher: 1. 1-5
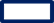
 2. 6-10
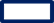
 3. 11-15
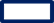
 4. 16-20
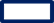
 5. 21 and above____ _________
   7. Years of experience as a pre-primary/ primary school principal: 1. 1-5
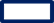
 2. 6-10
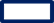
 3. 11-15
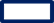
 4. 16-20
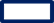
 5. 21 and above_____________
   8. Training in preschool education 1.
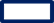
 Yes, 2. No
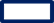

   9. Duration of the training 1.One month
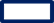
 2. Three months
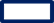
 3. Six month
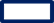
 4. One year
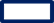
 5. Greater than one year
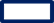
 6. Any other ____
   10. Training in Education Leadership: 1. No formal training
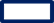
 2. Short-term training
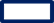
 3. Professional development courses
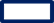
4.Diploma in educationalleadership
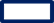
 5. Degree in educational leadership 6**.** Any other________

1. **Existing Practices Pre-Primary Education in Preprimary Schools Gambella Regional State, Ethiopa**

Assessing the current practices and quality service provisionin pre-primary schools can be accomplished through the examination of various indicators. Kindly express your level of agreement or disagreement in the table below. Use a Likert scale of 1 to 5, where 1. "Strongly Disagree," 2. "Disagree," 3. "Not sure," 4. "Agree," and 5. "Strongly Agree."

**Table: 1 Existing Practices of Pre-Primary Education and its Provision of Quality Services**

| **No.** | **Items** | **Scale** | | | | |
| --- | --- | --- | --- | --- | --- | --- |
| **1** | **2** | **3** | **4** | **5** |
|  | **Existing Practices of Teaching-Learning Materials and Learning Environment** |  |  |  |  |  |
| 1 | The school has guidelines for the implementation of pre-primary education. | 1 | 2 | 3 | 4 | 5 |
| 2 | The school provides age-appropriate teaching-learning materials. | 1 | 2 | 3 | 4 | 5 |
| 3 | The curriculum includes activities that enhance children's interaction. | 1 | 2 | 3 | 4 | 5 |
| 4 | Teacher-student ratio is according to the standard set by the Ministry of Education. | 1 | 2 | 3 | 4 | 5 |
| 5 | The size of the classrooms is adequate for children’s. | 1 | 2 | 3 | 4 | 5 |
| 6 | The school classrooms are well ventilated. | 1 | 2 | 3 | 4 | 5 |
| 7 | The tables and chairs are fit to children’s age and maturity. | 1 | 2 | 3 | 4 | 5 |
|  | **Existing Leadership and Monitoring Practices** | 1 | 2 | 3 | 4 | 5 |
| 1 | The school leaders regularly monitor teaching and learning in the pre-primary school. | 1 | 2 | 3 | 4 | 5 |
| 2 | The school leaders inform the goals of the pre-primary school to staff. | 1 | 2 | 3 | 4 | 5 |
| 3 | The school leaders actively involve stakeholders in decision-making. | 1 | 2 | 3 | 4 | 5 |
| 4 | The school leaders ask for support from different bodies to meet the needs of pre-primary education. | 1 | 2 | 3 | 4 | 5 |
|  | **Attachment of Pre-Primary Education to Primary School** |  |  |  |  |  |
| 1 | The attachment of pre-primary education to primary school has not created problems in the teaching and learning of children. | 1 | 2 | 3 | 4 | 5 |
| 2 | The attachment of pre-primary education to primary school has no effect on preprimary education. | 1 | 2 | 3 | 4 | 5 |
| 3 | The attachment of pre-primary education to primary school has no leadership challenges. | 1 | 2 | 3 | 4 | 5 |
| 4 | It is good to separately establish preprimary schools from primary school. | 1 | 2 | 3 | 4 | 5 |
| 5 | The attachment of pre-primary education to primary school enhances the transition process for children. | 1 | 2 | 3 | 4 | 5 |
|  | **Status of Quality Service Provision** |  |  |  |  |  |
| 1 | There is improvement in reading skills of children. | 1 | 2 | 3 | 4 | 5 |
| 2 | Children have shown improvement in recognizing alphabet letters. | 1 | 2 | 3 | 4 | 5 |
| 3 | Children's interest in learning /coming to school daily/ was improved. | 1 | 2 | 3 | 4 | 5 |
| 4 | In pre-primary school the average performance of children in the class has improved. | 1 | 2 | 3 | 4 | 5 |
| 5 | Parents are satisfied with the services provided by the pre-primary school. | 1 | 2 | 3 | 4 | 5 |
| 6 | The retention of children in the pre-primary school has improved. | 1 | 2 | 3 | 4 | 5 |

Thank you for your participation!!

Jimma University

College of Education and Behavioral Sciences

Department of Educational Planning and Management

**Interview guide for Education Bureau head, and directors**

Instructions: The interview guide aims to collect information on the practices and determinants of quality service provision in pre-primary schools of the Gambella Region: Hence, you are kindly requested to respond honestly and thoughtfully. The success of the study depends on your genuine information. The information to be gathered will be used only for research purposes. The information from participants will be used confidentially. Your frank responses will be highly appreciated.

As per the study objectives, the emphasis will be on key thematic areas.

**Section A: Background Information:**

1. What is your highest qualification?

2. What is your position?

3. How long have you been in your position?

**Section B: Information on specific variables of the study**

1. The current state and implementation of quality service provision in pre-primary education

i. What roles are expected of the REB in the management and supervision of preprimary school? Does it have a distinct organizational structure, starting from the 'Woreda' level and with a designated head teacher responsible for the program?

ii. Is the policy regarding pre-primary education effectively put into practice? what do you say about the attachments of pre-primary school to primary school?

iii. How would you evaluate the current status of pre-primary education in the Gambella Regional State?

iv. What are the fundamental determinants for ensuring quality service provision in pre-primary schools within the Gambella Region State?

v. Has there been any progress in the quality of service provision in pre-primary schools in the Gambella Region as a result of the expansion of pre-primary education?

vi. Overall, what is your perspective on the quality service provision of pre-primary education in the Gambella Region?

Jimma University

College of Education and Behavioral Sciences

Department of Educational Planning and Management

**Interview guide for Parents' representatives**

Dear respondent,

You have been selected to participate in this study entitled: Practice, and determinants of quality services provision in preprimary school of Gambella Regional State, Ethiopia. The information sought is required for academic purposes only and participation is entirely out of your own will; and necessary for the success of this study. I request you to respond with truthfulness and honesty for the success of the study. Remember that the information you provide will also be treated with maximum confidentiality.

1. Demographic characteristics of Respondents

Gender__________

Age ___________

Number of years________ spent in __________Kabale__________Woreda as a resident

Educational level_____________

1. **Information on specific variables of the study**
2. **Pre-primary education practice and Parental participation in the provision of learning materials for pre-primary school**
   1. How do you perceive the current practices of pre-primary education in this particular school?
   2. What types of services are provided for your child/children in this pre-primary school? Do you consider these services to be quality?
   3. Does this pre-primary school have a sufficient number of qualified teachers?
   4. How available and dedicated are the teachers in this pre-primary school in carrying out their responsibilities?
   5. Do the pupils in this pre-primary school have access to an adequate amount of learning materials?
   6. Does this pre-primary school have enough classrooms and toilets?
   7. Is this pre-primary school accessible to all children of school age?
   8. Have you noticed any improvement in your child's reading and writing skills as a result of the good service provision in this pre-primary school?
   9. What is your level of involvement in providing teaching and learning materials for this pre-primary school, and what materials do parents typically contribute to the school?
   10. Overall, what is your opinion on the quality of services provided by this pre-primary school?

Jimma University

College of Education and Behavioral Sciences

Department of Educational Planning and Management

**Focus Group Discussion Leading Questions for Woreda Education Office Head, and Team Leaders**

Dear Group members:

The purpose of this Group discussion is to collect information on the practices and determinants of quality service provision in pre-primary schools of the Gambella Region: Hence, you are kindly requested to respond honestly and thoughtfully. The success of the study depends on your genuine information. The information to be gathered will be used only for research purposes. The information from participants will be used confidentially. Your frank responses will be highly appreciated.

As per the study objectives, the emphasis will be on key thematic areas.

**Section A: Information on specific variables of the study**

1. The current practices and level of quality service provision of pre-primary education

1. Is the policy regarding pre-primary education effectively put into practice in your woreda? What do you say about the attachments of pre-primary school to primary school?
2. How is pre-primary education managed in your woreda?
3. How would you assess the current level of pre-primary education in your woreda?
4. What is the practice of delivering quality services in pre-primary schools in your woreda?
5. Have there been any improvements in the provision of quality services in pre-primary schools as a result of the expansion of pre-primary education?
6. How do you evaluate the outcomes of pre-primary education services at the preschool level, in terms of their quality, in your woreda?
7. Overall, what is your opinion on the quality of pre-primary education in all the pre-primary schools in your respective area?
8. **Jimma University**
9. **College of Education and Behavioral Sciences**
10. **Department of Educational Planning and Management**
11. **Observation Checklist for selected preprimary schools**

| **No** | **I. Teaching learning process** | **Yes** | **No** | **Remark** |
| --- | --- | --- | --- | --- |
| 1 | Implementation of the preschool syllabus of the country. |  |  |  |
| 2 | Instructional documents in the class e.g. teachers guides, syllabus, checklists, student portfolio, communication books, and other documents. |  |  |  |
| 3 | Education schedule based on preschool standards |  |  |  |
| 4 | Teaching methodology of teachers |  |  |  |
|  | **II. Classroom TL materials** |  |  |  |
| 5 | Teaching aids in the classrooms |  |  |  |
| 6 | Picture placement at the eye level of children |  |  |  |
| 7 | Adequate lighting and width of the class |  |  |  |
| 8 | Books and teaching aids promote the holistic development of students |  |  |  |
| 9 | Classrooms Furnishes appropriate for the physical size of the children |  |  |  |
| 10 | The classroom suitability for children with special needs |  |  |  |
| 11 | Access of textbook for children |  |  |  |
| 12 | The number of children in a class according to the standard of preschool |  |  |  |
|  | **III. Language and culture** |  |  |  |
| 13 | Teaching materials and pictures reflecting the society’s culture |  |  |  |
| 14 | Mother tongue used in teaching-learning process |  |  |  |
|  | **IV. Outdoor materials** |  |  |  |
| 15 | Playing materials in the compound |  |  |  |
| 16 | Adequate playing materials according to the number of students |  |  |  |
|  | **V. Service rooms** |  |  |  |
| 17 | Convenient toilets for all children |  |  |  |
| 18 | Separate toilets for girls and boys & children and adults |  |  |  |
| 19 | Sanitation of toilets |  |  |  |
| 20 | Availability of pipe water |  |  |  |
